# Supplementary material for: REM sleep is associated with distinct global cortical dynamics and controlled by occipital cortex
Source: Springer Nature journal article supplement (doi:10.1038/s41467-022-34720-9), 2022-11-12
Supplement: MOESM1 [file 41467_2022_34720_MOESM1_ESM.pdf]

**REM Sleep is Associated with Distinct Global Cortical  
Dynamics and Controlled by Occipital Cortex**

## Supplementary figures and legends

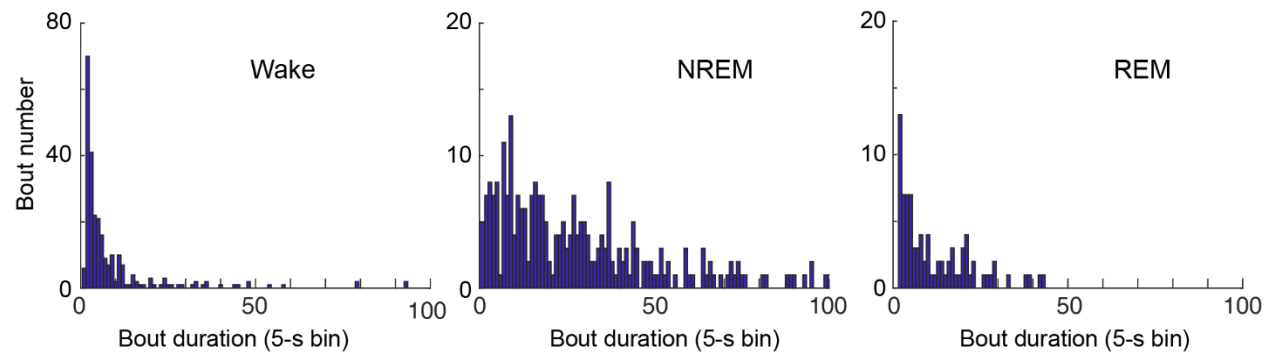

**Supplementary Fig. 1 | Sleep architecture of mice during the mesoscale  $\text{Ca}^{2+}$  imaging (related to Fig. 1).**

Shown is the distribution of bout duration for each sleep-wake state.  $n = 15$  recordings from 5 mice.

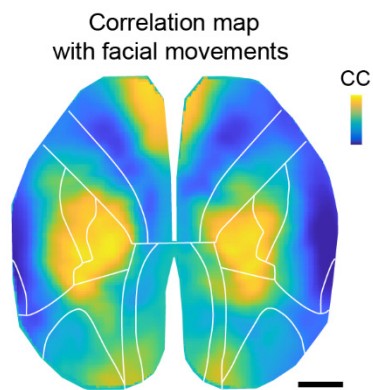

**Supplementary Fig. 2 | Cortical activity associated with facial movements (related to Fig. 1).**

Shown is the mean correlation map between cortical activity and facial movements.  $n = 9$  recordings from 5 mice. Scale, CC -0.3 – 0.3. Black bar, 1 mm.

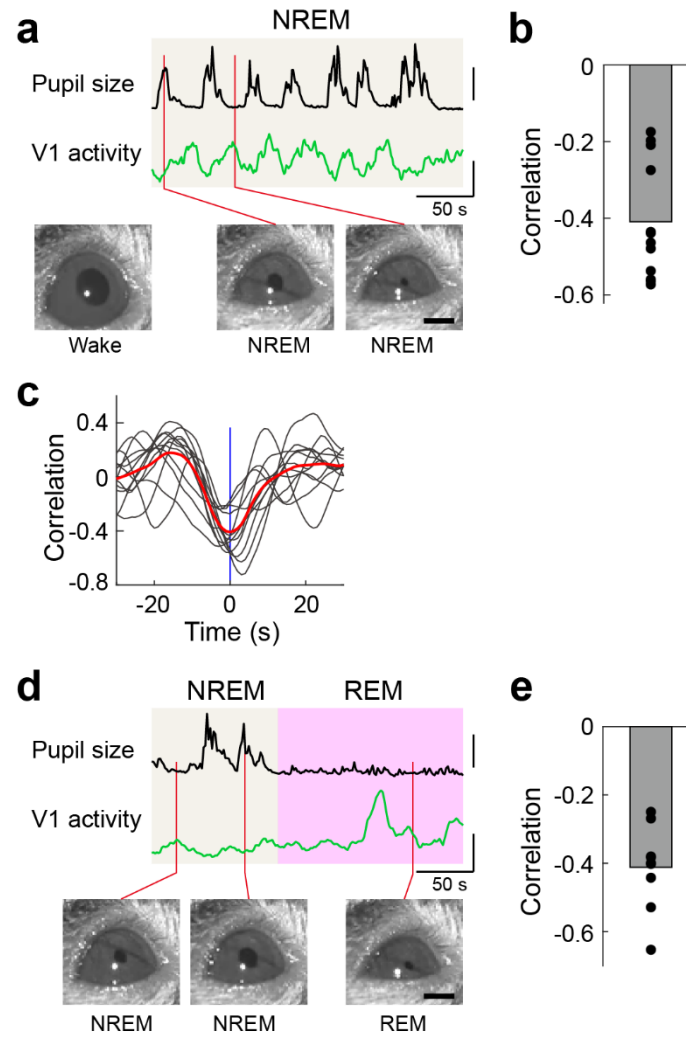

**Supplementary Fig. 3 | Relationship between pupil size and V1 activity during recording (related to Fig. 1).**

**a** An example of pupil size (Scale, 1 mm) and V1 activity (Scale,  $\Delta F/F_0$ , 1 z-score) during NREM sleep. **b-c** Quantification of cross-correlation between the two signals. In **b**,  $n = 12$ . In **c**,  $n = 12$ . **d-e** Same as **a-b**, except that analysis was performed for data during the NREM to REM transition period. In **d**, (Scale, 1 mm and  $\Delta F/F_0$ , 1 z-score). In **(e)**,  $n = 9$ . All black bars in the figure represent 1 mm. Raw data for **b** and **e** are provided in a Source Data file.

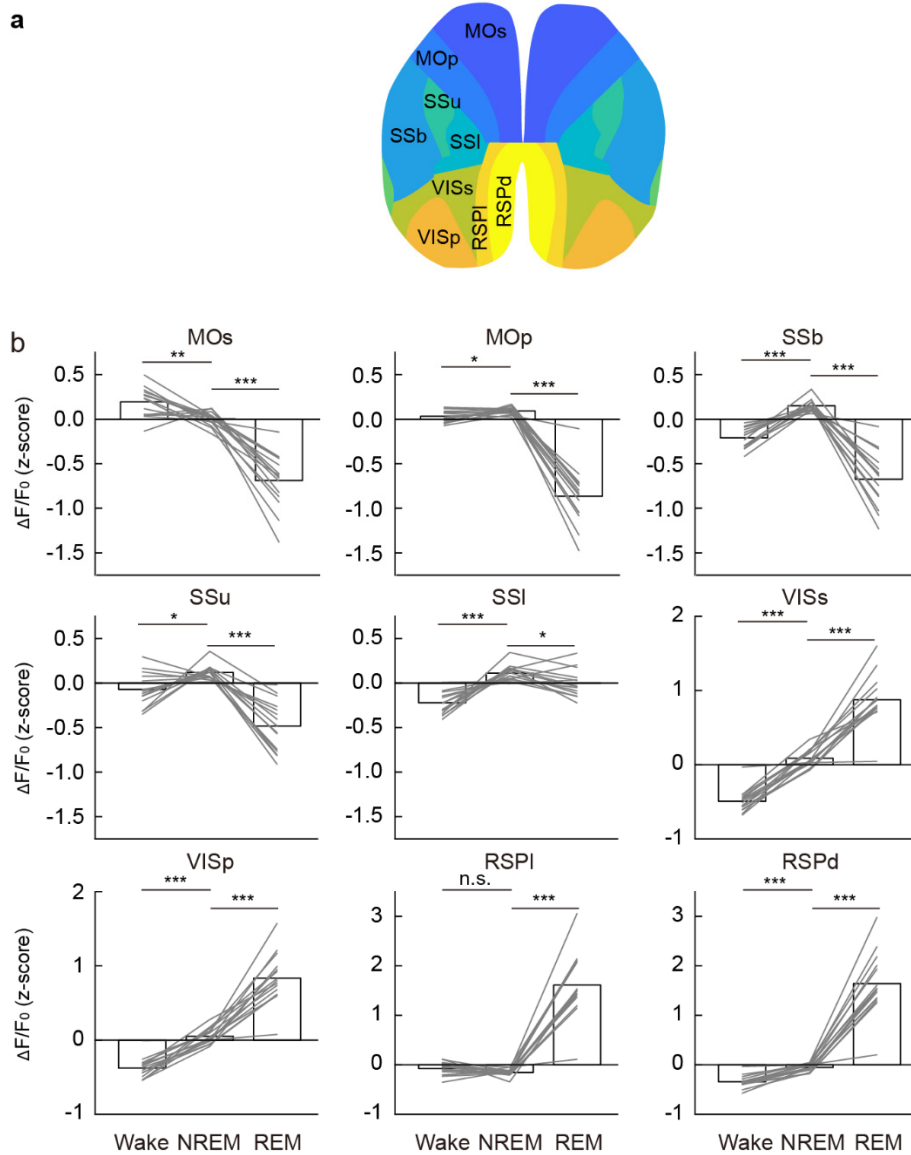

**Supplementary Fig. 4 | Normalized activity in each brain region during the sleep-wake cycle (related to Fig. 1).**

**a** Schematic diagram of the anatomical atlas used for alignment. **b** Quantification of the normalized (z-score) activity in each region during the sleep-wake cycle. The averaged  $\text{Ca}^{2+}$  activity in each region during each recording was first z-score normalized, and then mean activity in the three brain states was computed.  $n = 15$  recording sessions from 5 mice. \* $P < 0.05$ , \*\* $P < 0.01$ , \*\*\* $P < 0.001$ ; Student's paired  $t$ -test or Wilcoxon signed-rank test. MOs, secondary motor cortex; MOp, primary motor cortex; SSb, somatosensory cortex, barrel field; SSu, somatosensory cortex, upper limb; SSI, somatosensory cortex, lower limb; VISp, primary visual cortex; VISs, association

visual cortex; RSPd, dorsal retrosplenial cortex; RSPl, lateral retrosplenial cortex. Raw data for **b** are provided in a Source Data file.

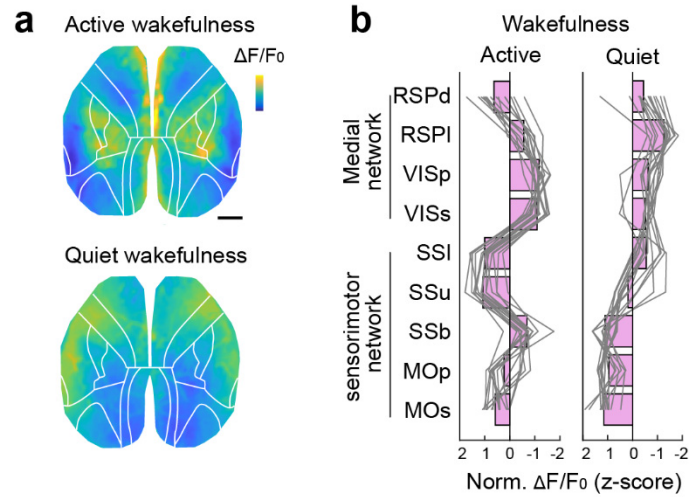

**Supplementary Fig. 5 | Normalized activity in each brain region during active and quiet wakefulness (related to Fig. 1).**

**a** Average  $\text{Ca}^{2+}$  activity during active and quiet wakefulness. Scale ( $\Delta F/F_0$ , z-score): -1.2 – 1.2. The black bar is 1 mm. **b** Normalized activation across the recorded brain regions in active and quiet wakefulness.  $n = 15$  sessions from 5 mice. Raw data for **b** are provided in a Source Data file.

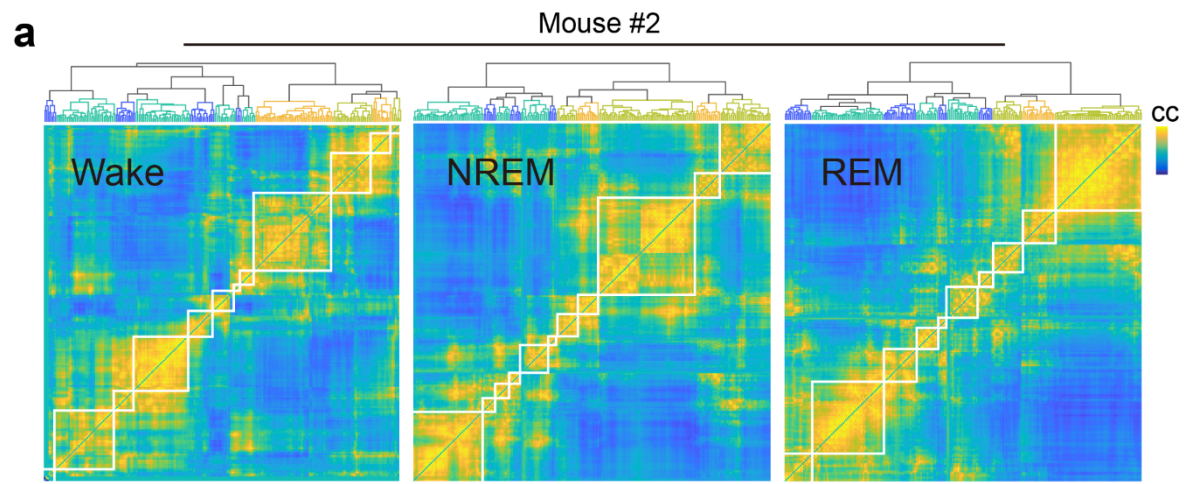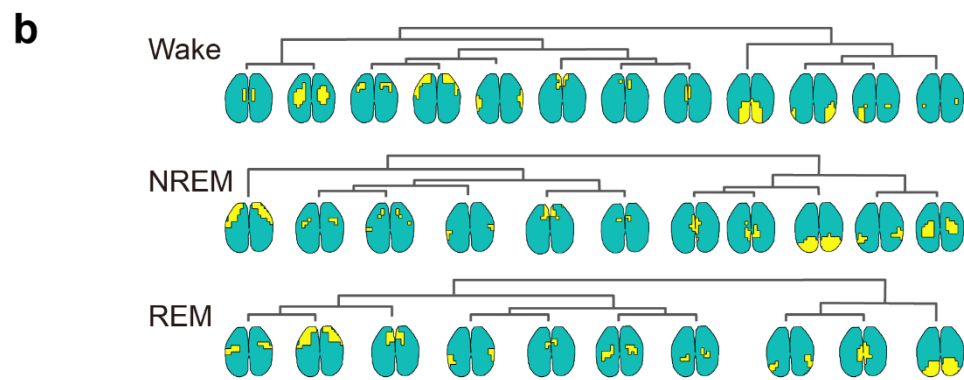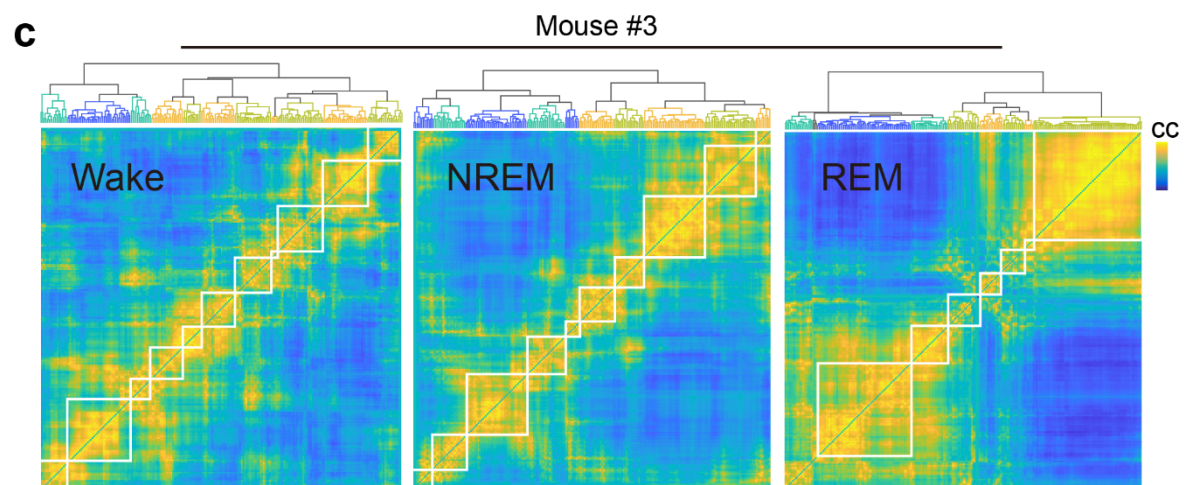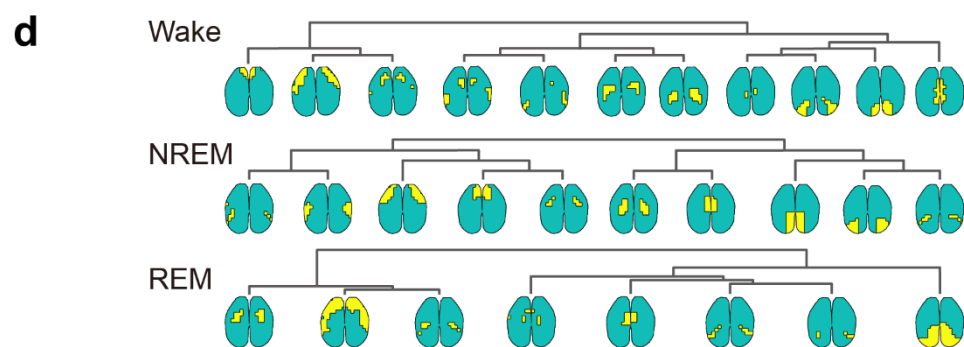



**Supplementary Fig. 6 | Regional activity correlation matrix during each sleep wake state (related to Fig. 2)**

**a** Regional activity correlation matrix during Wake (left), NREM (middle), and REM (right) in one example recording (~70 minutes). **b** Cortical networks revealed by the hierarchical clustering analysis. **c-d** Same as **a-b**, except that data were from a different mouse. All color scales are -1 – 1.

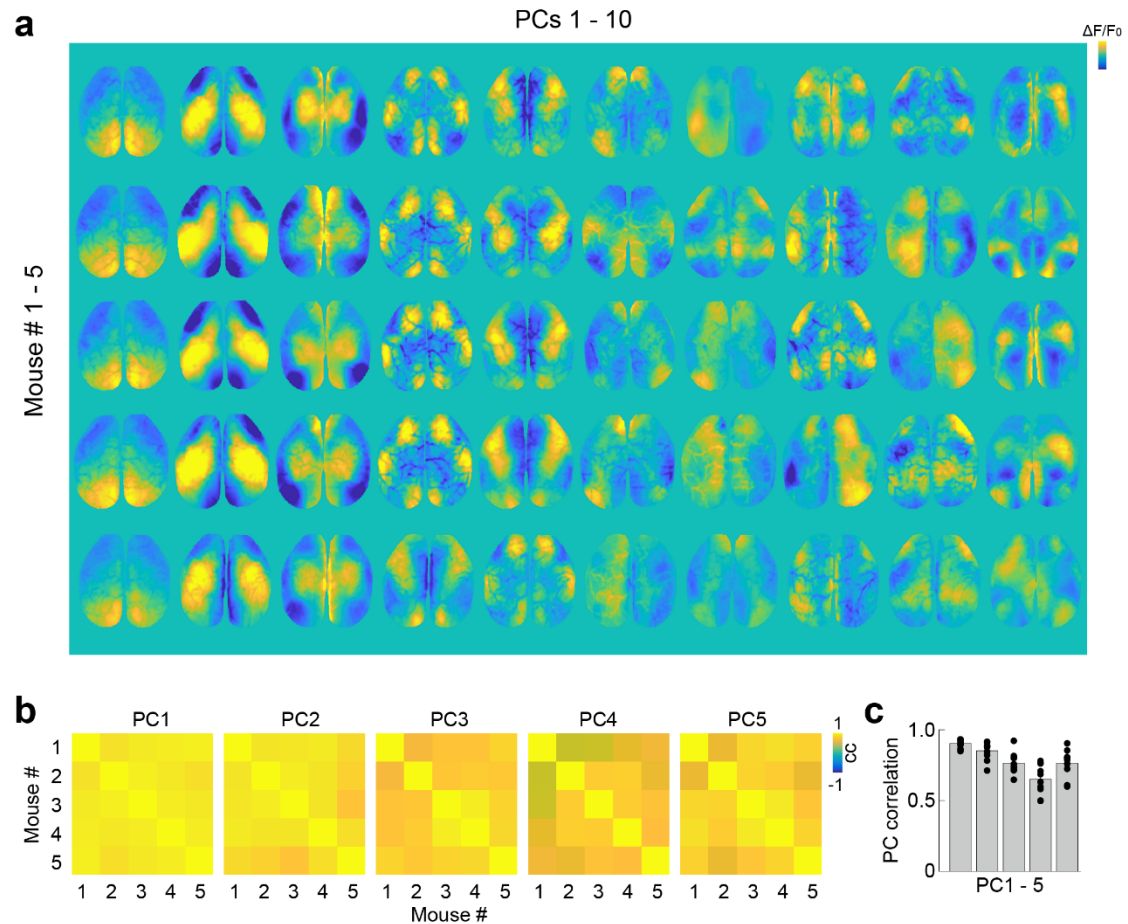

**Supplementary Fig. 7 | PCA of neocortical activity patterns during the sleep-wake cycle (related to Fig. 3)**

**a** The first ten PCs in each mouse. The first five PCs in mouse #4 (the 4<sup>th</sup> row from the top) were also shown in Fig. 3a. Scale ( $\Delta F/F_0$ , norm. z-score): -1 – 1. **b** Cross-correlation of PC1-5 across mice. Note that PC4 and PC5 were swapped during analysis. **c** Quantification of pairwise cross-correlation in **b**. Data were from 5 mice. Raw data for **c** are provided in a Source Data file.

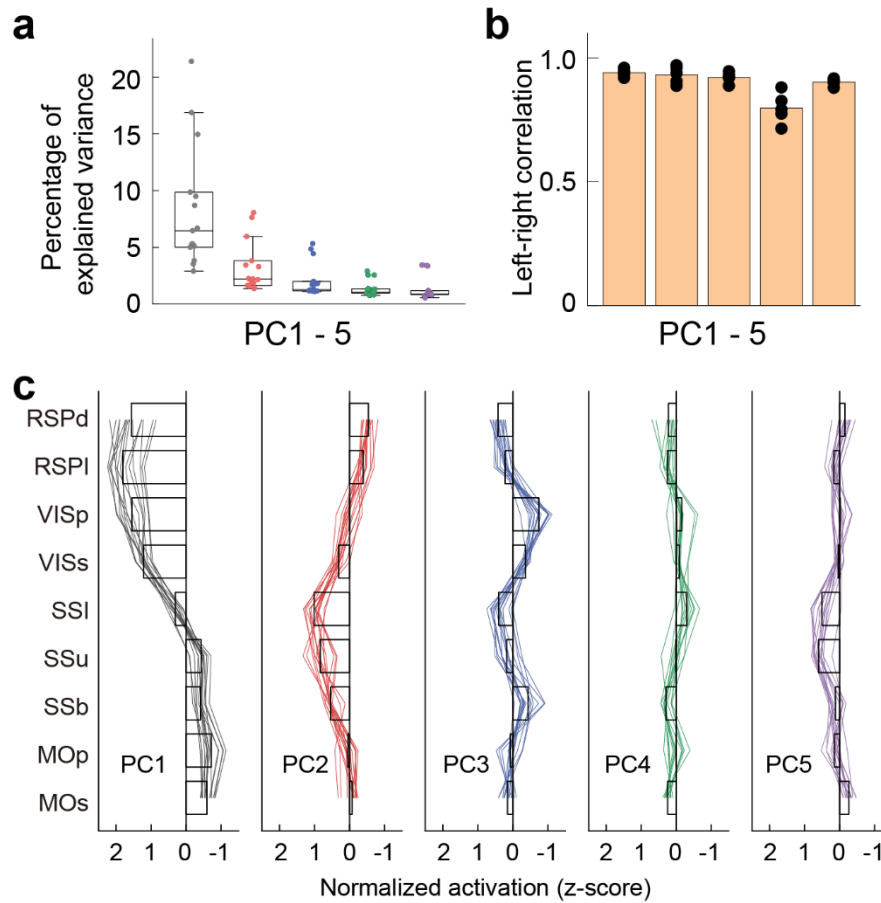

**Supplementary Fig. 8 | Additional analysis for the PCA results in Figure 3 (related to Fig. 3).**

**a** Percentage of explained variance of the five major PCs. Data of PC1 - PC5 were from 15, 15, 15, 13, and 14 sessions from 5 mice (2 or 3 sessions / mouse), respectively. The box plot shows a 25% -75% range, the whisker shows a range within the 1.5 interquartile range, and the line represents the median. **b** Cross-correlation between PC1-5 in the two hemispheres.  $n = 5$  recordings from 5 mice (1 recordings / mouse). **c** Normalized activation of the five major PCs in Figure 2A in each brain region. Each line represents data from one recording. Data of PC1 - PC5 were from 15, 15, 15, 13, and 14 sessions from 5 mice (2 or 3 sessions / mouse), respectively. Raw data are provided in a Source Data file.

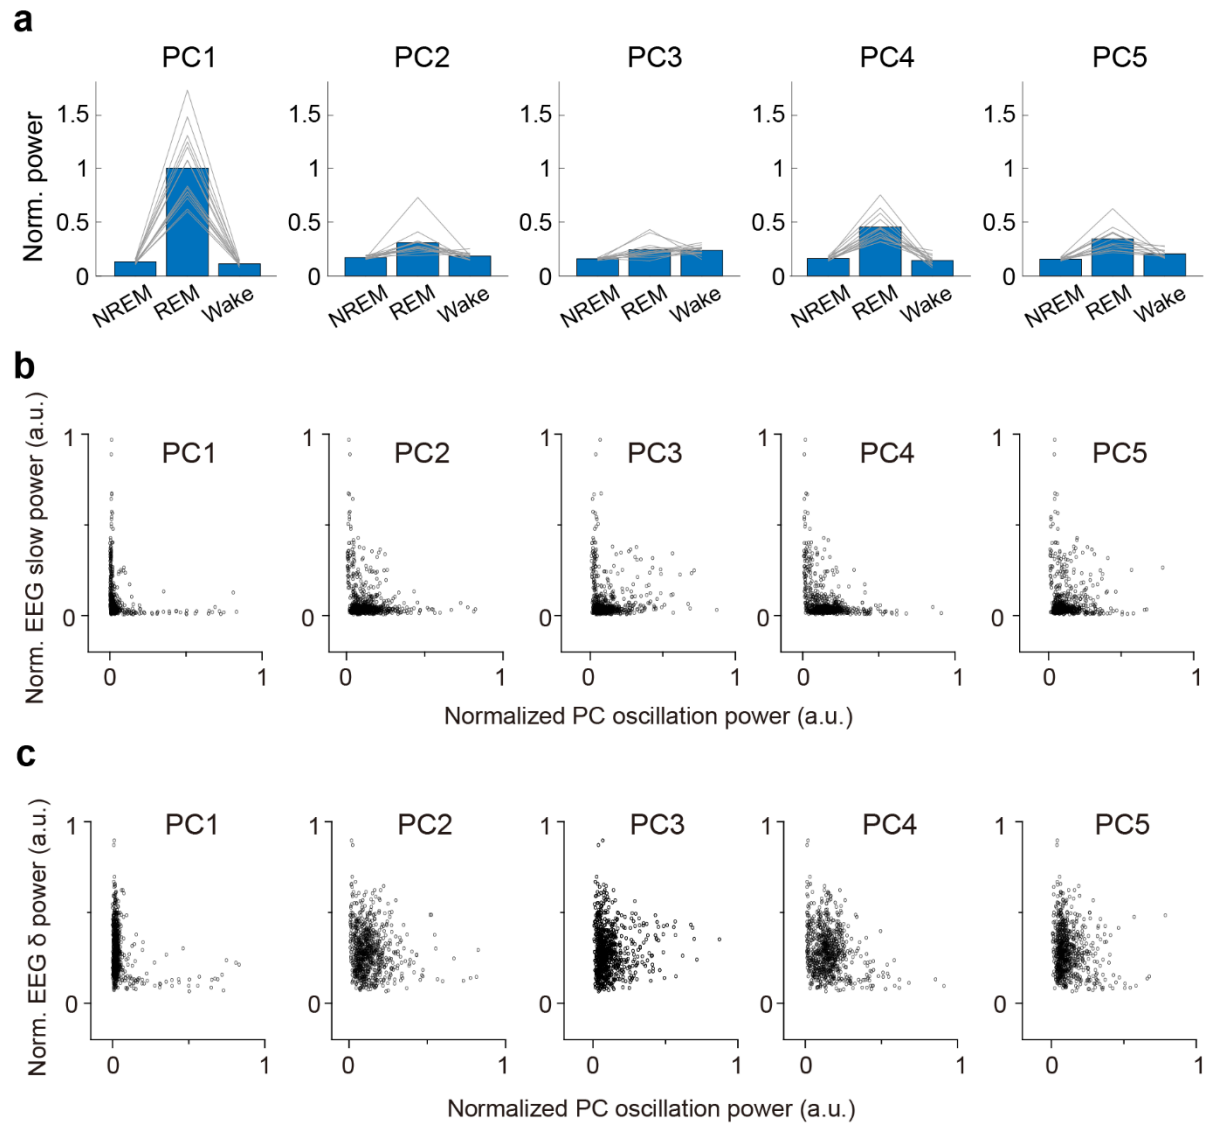

**Supplementary Fig. 9 | Analysis of oscillations in each PCs (related to Fig. 3)**

**a** Normalized power of oscillation (0 - 5 Hz) in each PCs during different brain states.

$n = 15$  recording. **b** Lack of correlation between the oscillation power in EEG slow

wave ( $< 1$ Hz) and the PCs. **c** Lack of correlation between the oscillation power in EEG

$\delta$  band (0.5 – 4 Hz) and the PCs. Raw data are provided in a Source Data file.

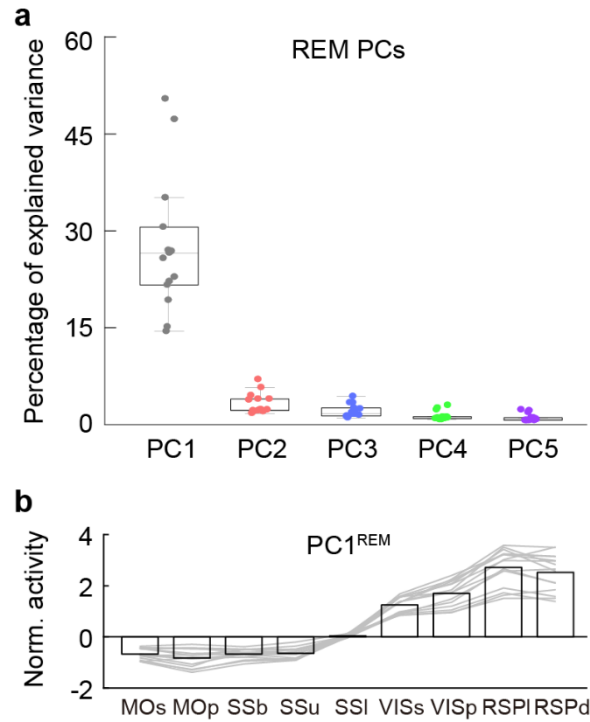

**Supplementary Fig. 10 | Percentage of explained variance of PC1-5 of REM and normalized activation of PC1<sup>REM</sup> in each brain region (related to Fig. 4)**

**a** Percentage of explained variance of the five major PCs of REM activity. Data of PC1 - PC5 were from 15 sessions from 5 mice, respectively (3 sessions / mouse). The box plot shows a 25% –75% range, the whisker shows a range within the 1.5 interquartile range, and the line represents the median. **b** Normalized activation of PC1<sup>REM</sup> in each brain region. Each line represents data from one recording.  $n = 15$  sessions from 5 mice (3 sessions / mouse). Raw data are provided in a Source Data file.

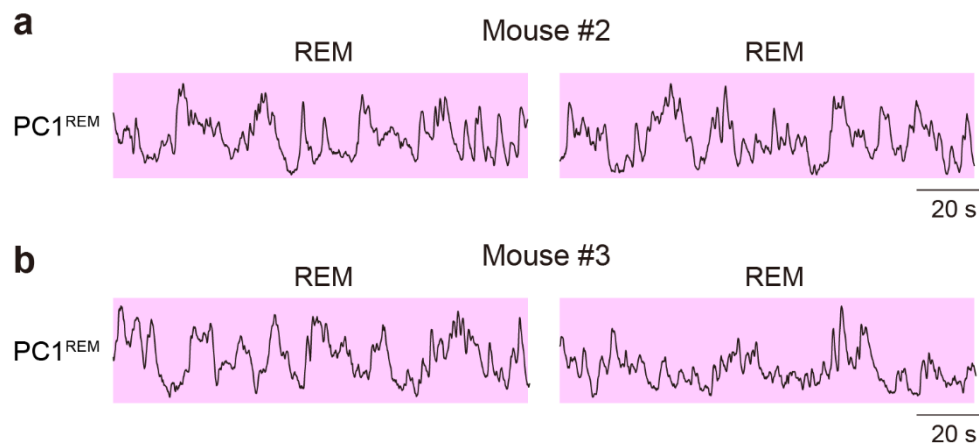

**Supplementary Fig. 11 | Dynamic changes in PC1<sup>REM</sup> from two other mice (related to Fig. 4)**

Shown are two additional examples of PC1<sup>REM</sup> from two other mice. Scale, 0.03.

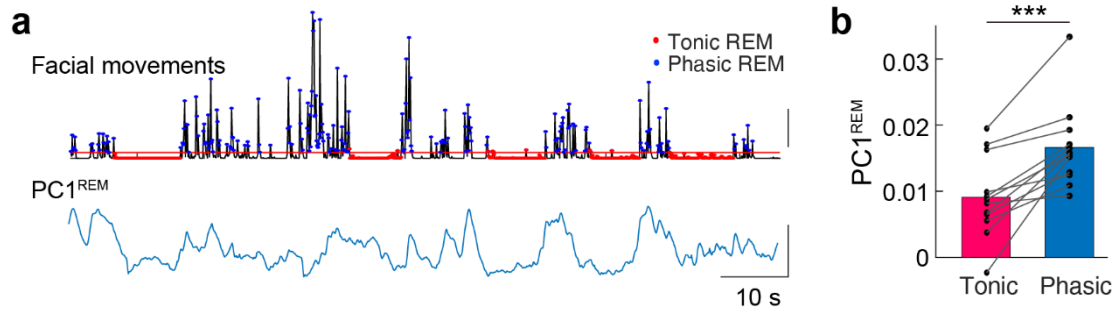

**Supplementary Fig. 12 | PC1<sup>REM</sup> during tonic and phasic REM (related to Fig. 4)**

**a** An example of facial movements (scale, 200 a.u.) and PC1<sup>REM</sup> (scale, 0.03). The Red line indicates the mean. **b** Quantification of PC1<sup>REM</sup> in tonic and phasic REM.  $P < 0.001$ , Wilcoxon signed-rank test.  $n = 12$  sessions from 5 mice. Raw data for **b** are provided in a Source Data file.

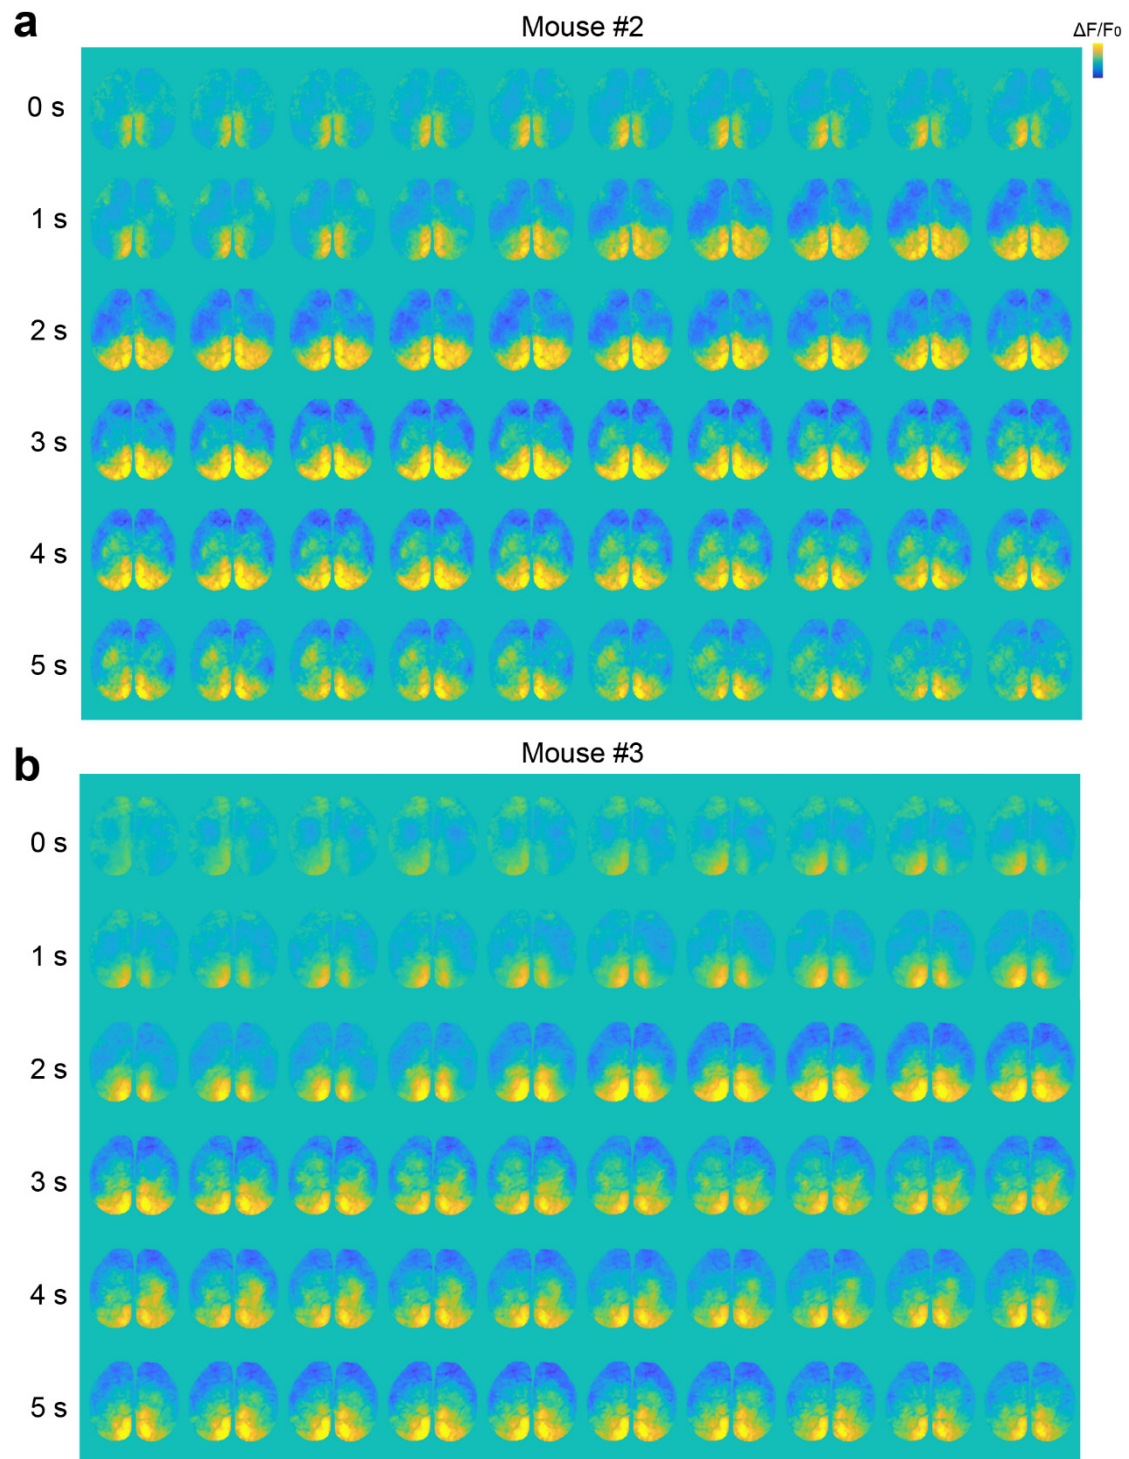

**Supplementary Fig. 13 | Spreading activity during REM sleep (related to Fig. 4)**

Shown are two examples of the spreading activity during REM sleep from two other mice. Images were acquired with a frame rate of 10 Hz. Scale ( $\Delta F/F_0$ , norm. z-score): -1 – 1.



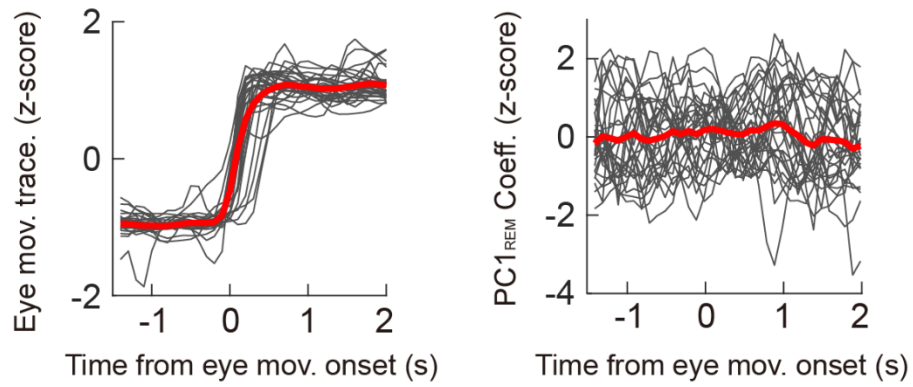

**Supplementary Fig. 14 | Lack of correlation between eye movements and occipital activity during wakefulness (related to Fig. 4)**

Shown are eye movements (left) and the associated occipital activity (right).  $n = 29$  eye-movement events from 5 mice. Black trace, data from each event; Red trace, group average.

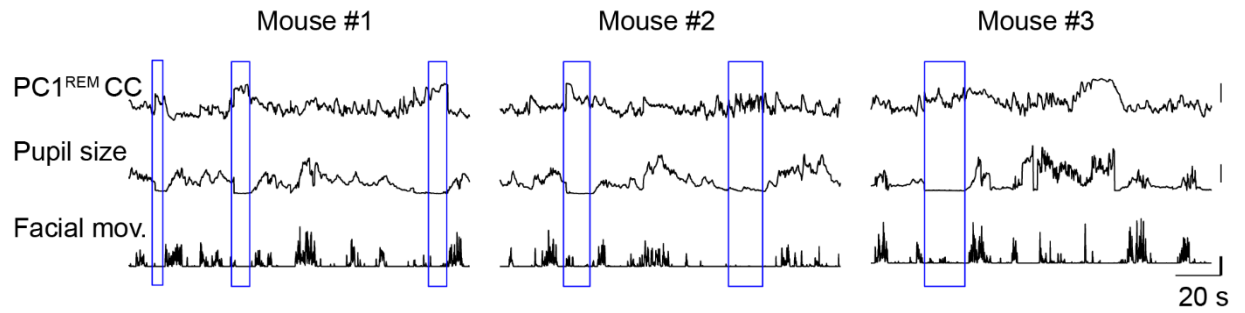

**Supplementary Fig. 15 |  $PC1^{REM}$ -like activity during drowsy states. (related to Fig. 5)**

Shown are three examples of  $PC1^{REM}$ -like activity during drowsy states. Drowsy states (highlighted in the blue box) were manually identified when the pupil was constricted and lack of facial movements. Scale, CC, 0.5; pupil size, 0.3 mm; facial movement, 1 a.u.

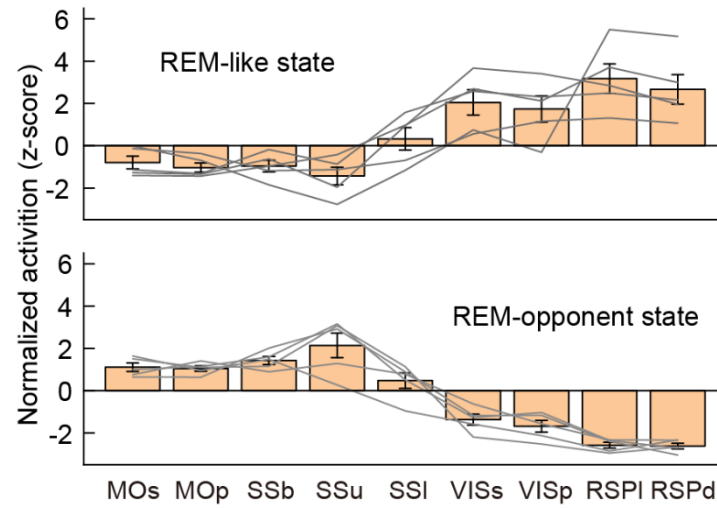

**Supplementary Fig. 16 | Cortical activity during the REM-like and REM-opponent states (related to Fig. 5)**

Shown is normalized cortical activity during the REM-like state and REM-opponent state. Each line represents data from individual image frames. Raw data are provided in a Source Data file.  $n = 5$  REM-like or REM-opponent events, respectively. Data are mean  $\pm$  SEM.

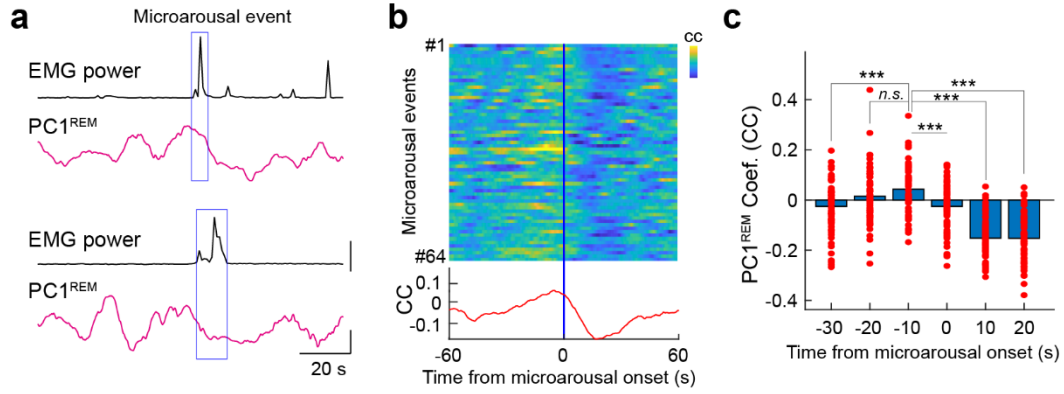

**Supplementary Fig. 17 | PC1<sup>REM</sup>-like activity and microarousal event (related to Fig. 5)**

**a** Two examples showing PC1<sup>REM</sup>-like activity during microarousal events (highlighted in the blue box). Scale, EMG power 100 a.u.; PC1<sup>REM</sup> coefficient (CC), 0.3. **b** PC1<sup>REM</sup> CC aligned to the onset of microarousal events ( $n = 64$  from 5 mice). Scale (CC), -0.4 – 0.4. **c** Quantification of change in PC1<sup>REM</sup> from all five mice. Statistical comparison was performed between the 3<sup>rd</sup> group (from -10 s to onset of microarousal events) and the other five groups. \*\*\* $P < 0.001$ ; *n.s.*,  $P > 0.05$  (one-way repeated measures ANOVA with Tukey's posthoc test).  $n = 64$ . Raw data for **c** are provided in a Source Data file.

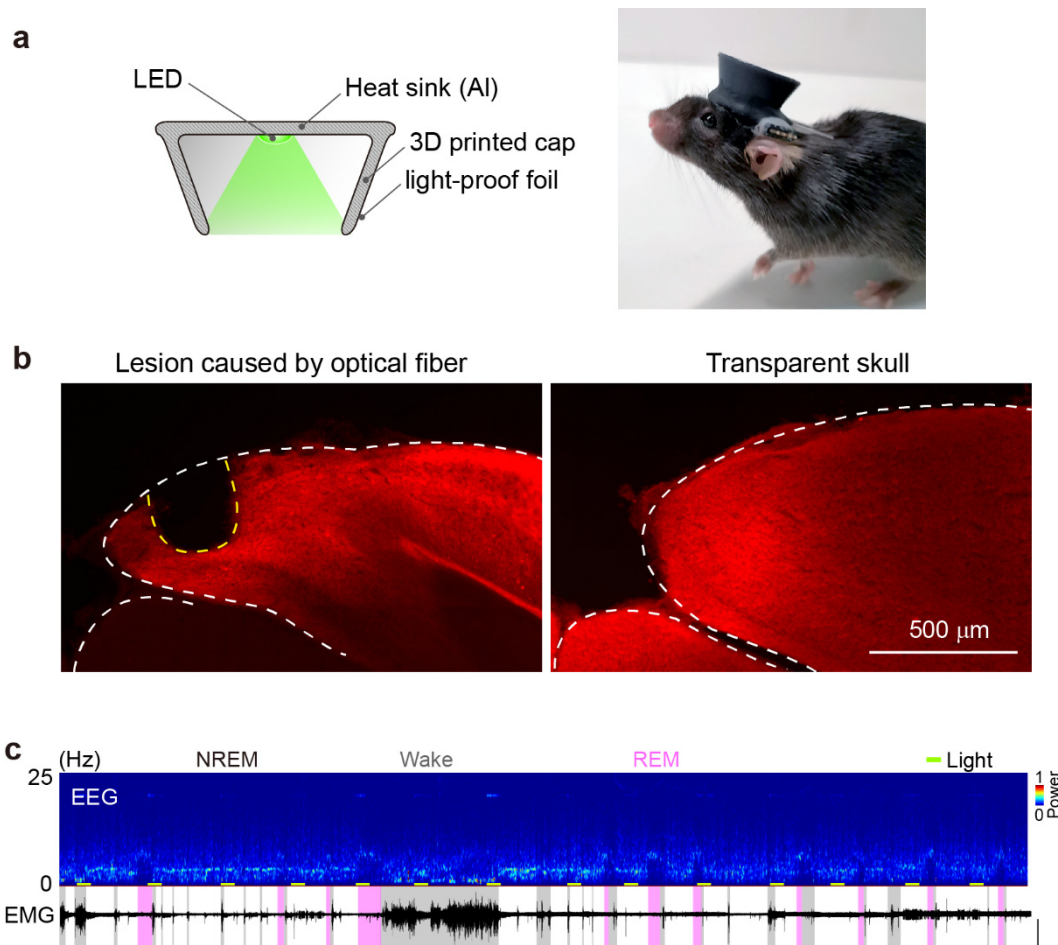

**Supplementary Fig. 18 | Optogenetic inhibition of the occipital neocortex during the sleep-wake cycle (related to Fig. 7)**

**a** Diagram of the light delivery device (left) and a photo of a mouse wearing the device (right). **b** Fluorescent pictures of the RSP from experiments in which light was applied through an optical fiber (left) or a transparent skull (right). The considerable damage to the tissue was caused by fiber insertion, while no detectable damage occurred using the transparent skull method. 4 and 11 mice were used in the fiber insertion or transparent skull method, respectively. **c** An example showing optogenetic inhibition of the occipital neocortex from a mouse expressing ChrimsonR. Top to bottom, EEG power spectrogram, EMG (scale, 120 s, and 1 mV).

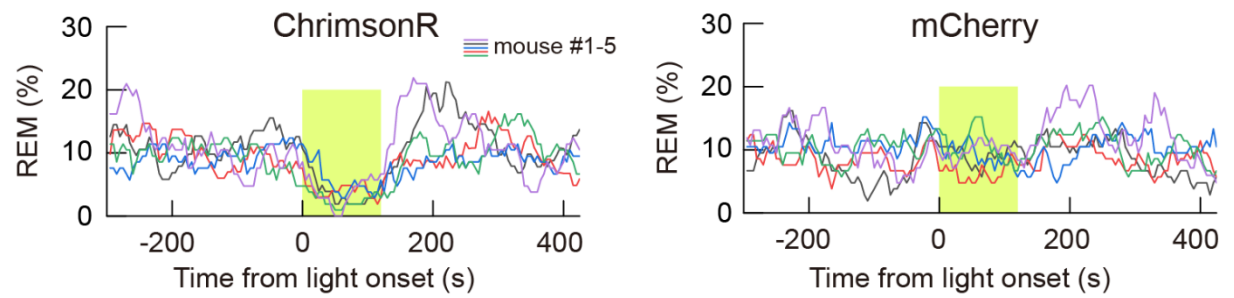

**Supplementary Fig. 19 | Light-induced REM sleep modulation in individual mice (related to Fig. 7)**

Shown is the modulation of REM sleep in each mouse during light stimulation (yellow shading) in mice expressing ChromsonR (left) or mCherry (right).  $n = 25$  sessions from 5 mice (5 sessions/mouse) for the ChromsonR group;  $n = 24$  sessions from 5 mice (4 or 5 sessions/mouse) for the mCherry group. Each line represents the average result from each mouse.

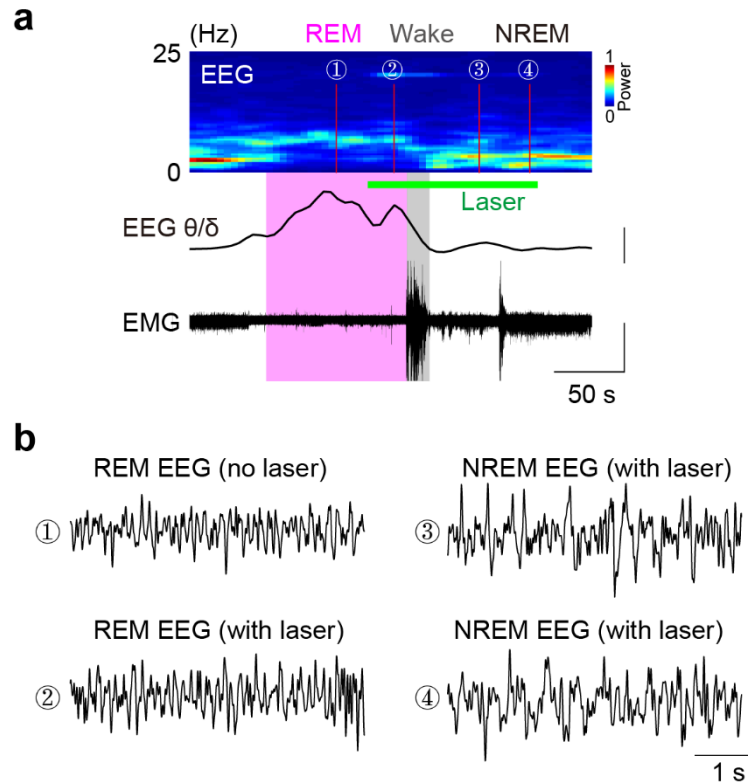

**Supplementary Fig. 20 | Light stimulation does not affect NREM-REM classification (related to Fig. 7)**

**a** An example showing EEG power spectrogram (up), EEG  $\theta/\delta$  ratio (middle; scale, 1), and EMG (low; scale, 0.5 mV). EEG traces from the four selected time points are shown in **b**. Scale in **b**, 50  $\mu$ V

**a**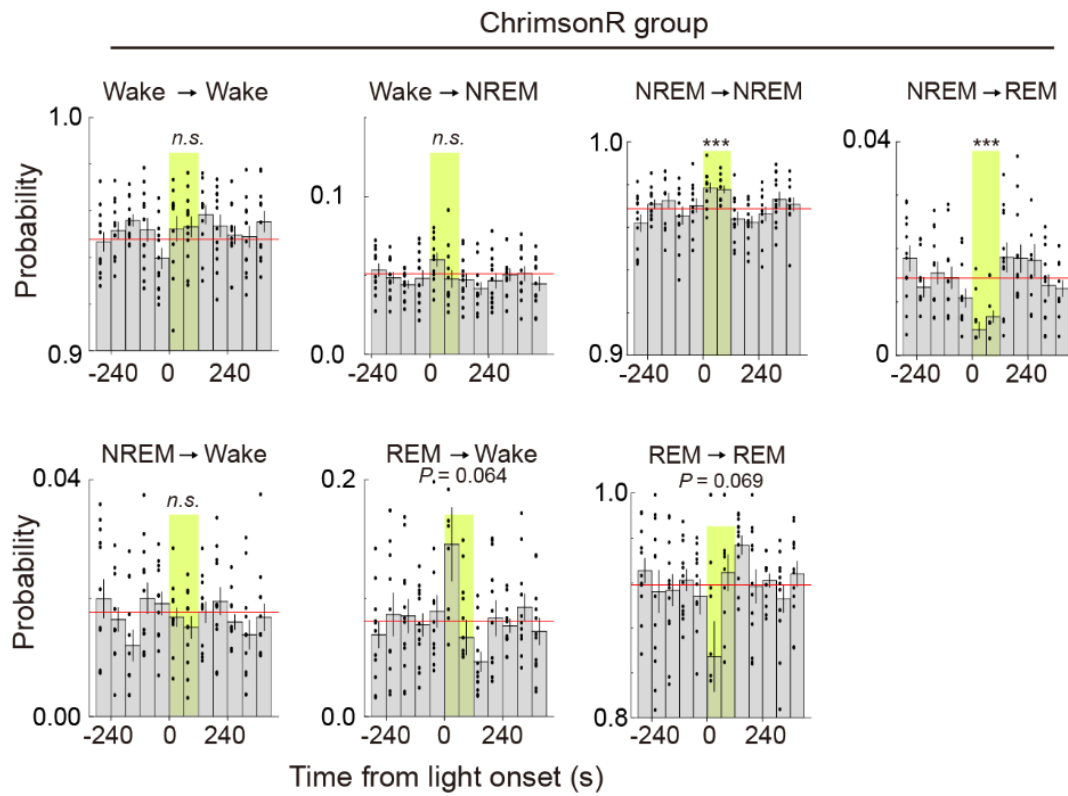**b**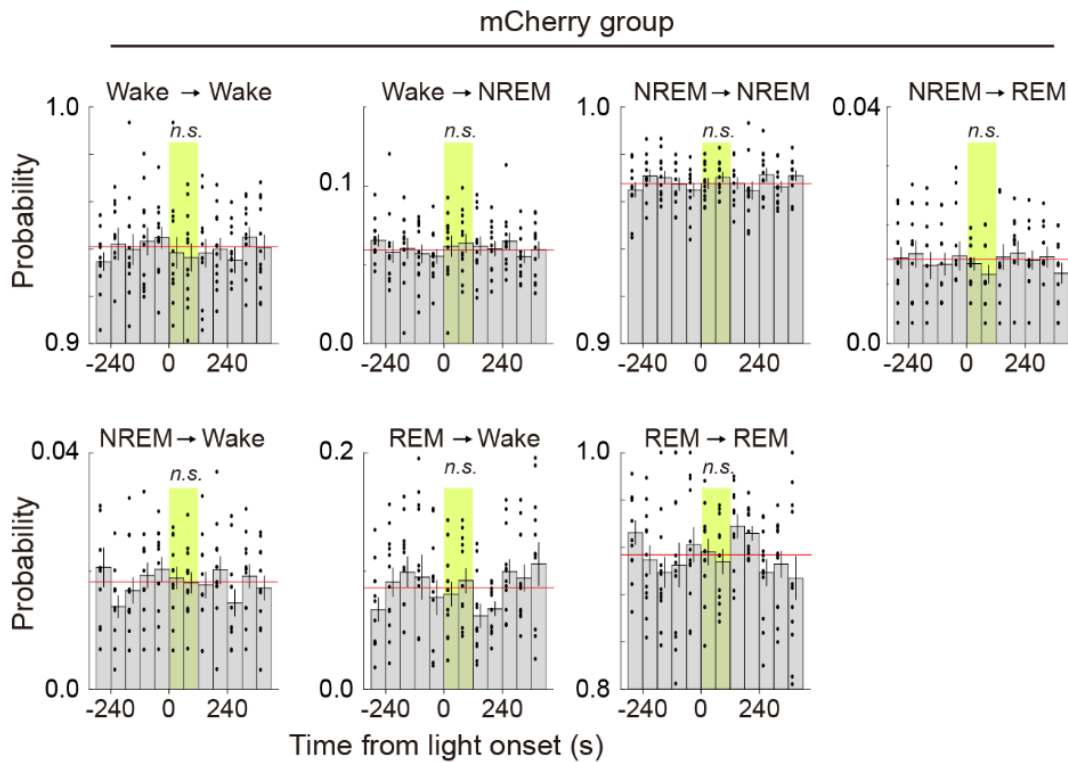

**Supplementary Fig. 21 | Brain state transitions during optogenetic inhibition of the occipital activity (related to Fig. 7)**



Shown is the probability of brain state transitions for the indicated pair of brain states. Red line, baseline transition probability. Yellow shading, light stimulation. Student's paired *t*-test or Wilcoxon signed-rank test. Data were from 25 sessions from 5 mice expressing ChrimsonR **(a)**, and 24 sessions from 5 mice expressing mCherry **(b)**. Part of the data for the ChrimsonR was already shown in Fig. 7, and these data were shown again to facilitate comparison with the mCherry group. Data are mean  $\pm$  SEM. Raw data and exact *P* values are provided in a Source Data file.

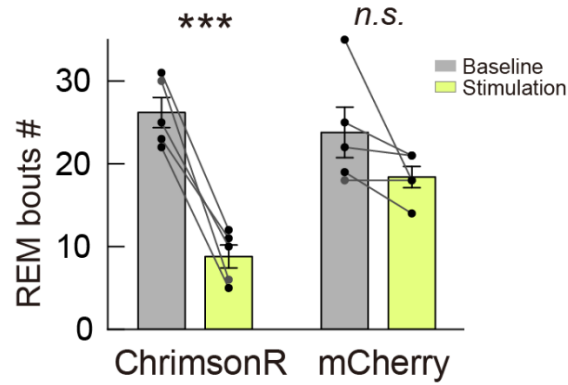

**Supplementary Fig. 22 | Light stimulation reduced REM bout number (related to Fig. 7)**

Shown is the mean number of REM bouts during stimulation and baseline in each experiment from ChromsonR and mCherry groups. The selected baseline period (2-minutes after each light stimulation) had the same duration as the stimulation period. ChromsonR:  $P < 0.0001$ ; mCherry:  $P = 0.15$ ; Paired  $t$ -test. Data were from 25 sessions from 5 mice expressing ChromsonR and 24 sessions from 5 mice expressing mCherry. Data are mean  $\pm$  SEM. Raw data are provided in a Source Data file.
